# Supplementary material for: Retrodeformation and muscular reconstruction of ornithomimosaurian dinosaur crania
Source: PeerJ journal article supplement (doi:10.7717/peerj.1093), 2015-07-09

*Garudimimus brevipes* GIN 100/18, original specimen

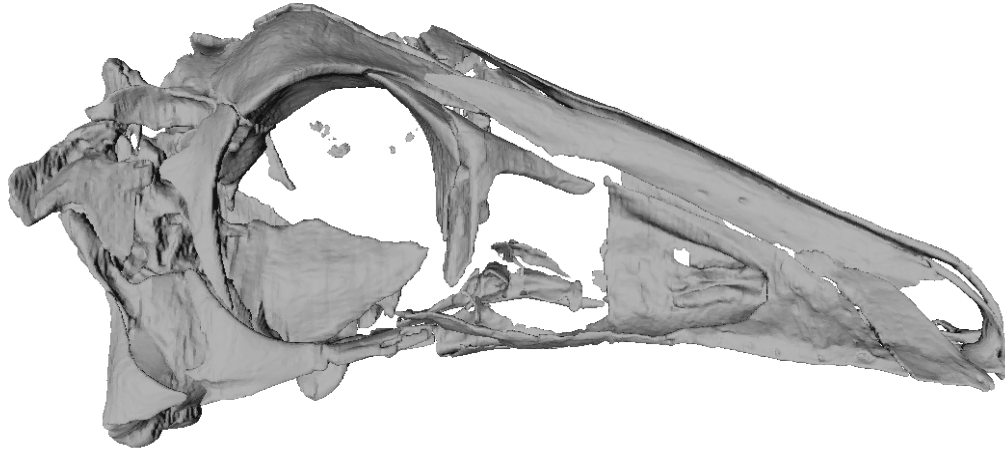

*Garudimimus brevipes*, after retrodeformation

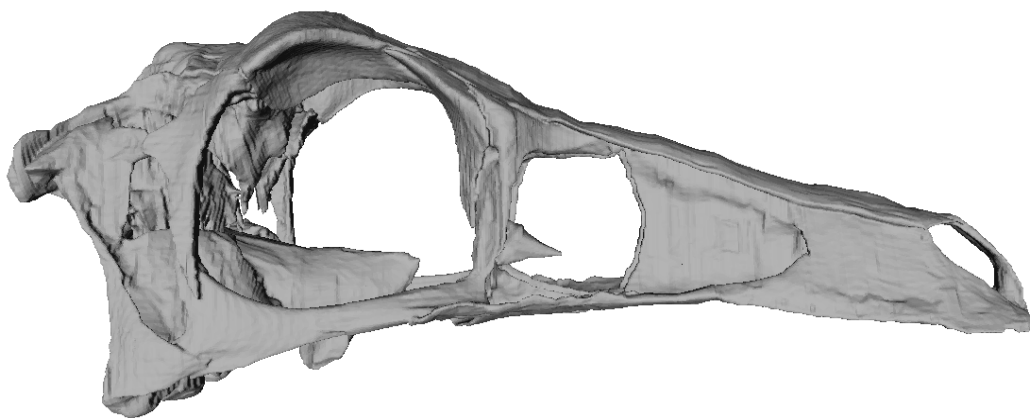

Supplement: Garudimimus.pdf [file Garudimimus.pdf]
