# Supplementary material for: Retrodeformation and muscular reconstruction of ornithomimosaurian dinosaur crania
Source: PeerJ journal article supplement (doi:10.7717/peerj.1093), 2015-07-09

*Ornithomimus edmontonicus* RTMP 95.110.1, original specimen

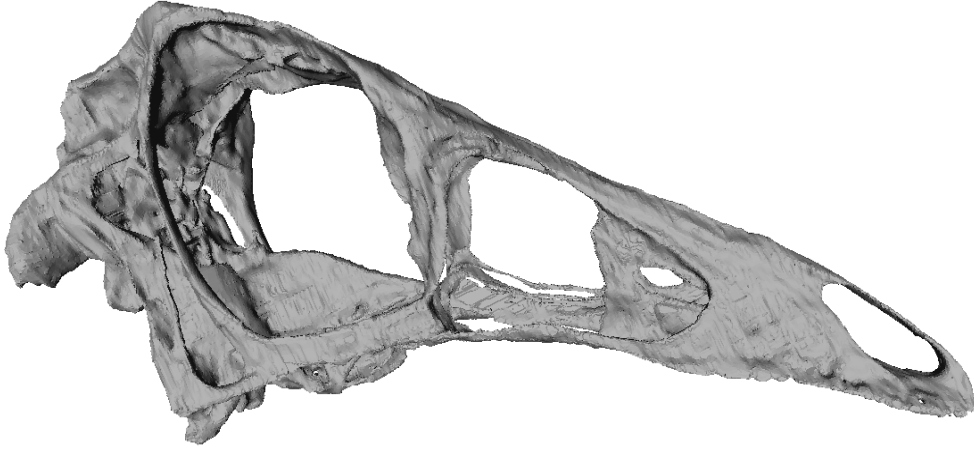

*Ornithomimus edmontonicus*, after retrodeformation

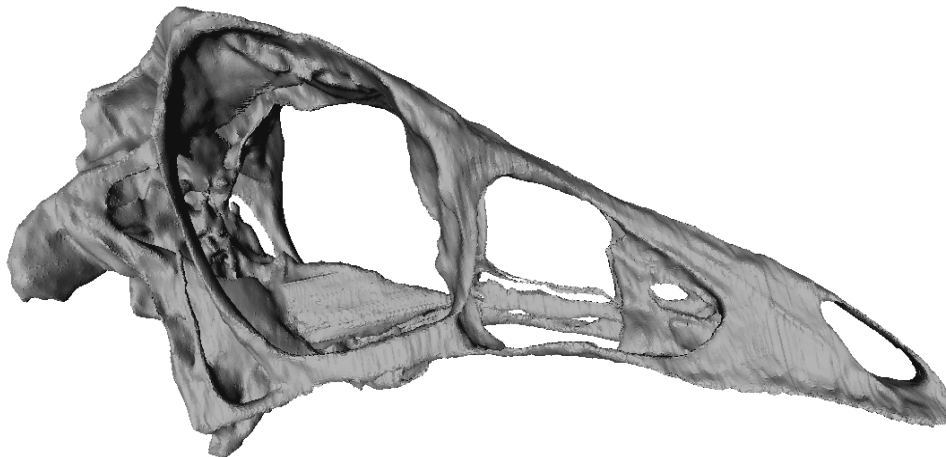

Supplement: Ornithomimus.pdf [file Ornithomimus.pdf]
