# Supplementary material for: Retrodeformation and muscular reconstruction of ornithomimosaurian dinosaur crania
Source: PeerJ journal article supplement (doi:10.7717/peerj.1093), 2015-07-09

*Struthiomimus altus* RTMP 90.26.1, original specimen

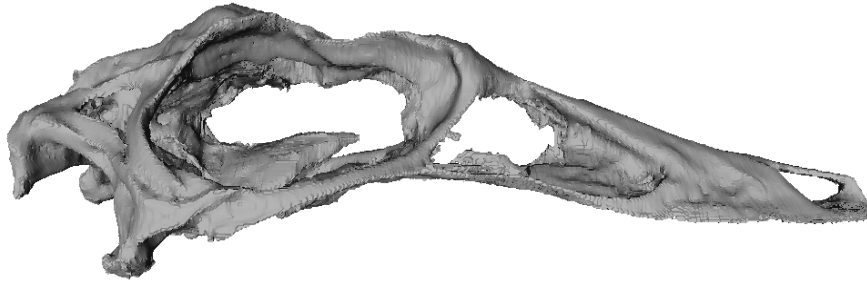

*Struthiomimus altus*, after retrodeformation

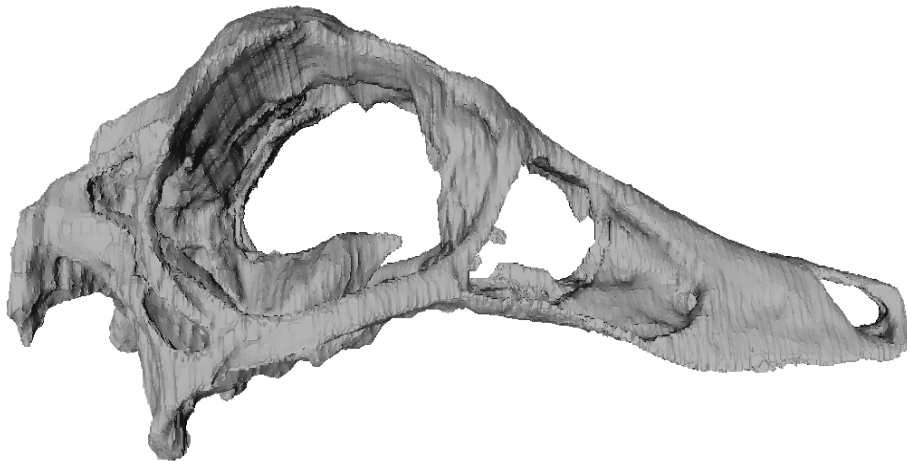

Supplement: Struthiomimus.pdf [file Struthiomimus.pdf]
